# Supplementary material for: Role of Resveratrol in Regulating Cutaneous Functions
Source: PubMed Central journal article supplement (PMC7180429; doi:10.1155/2020/2416837), 2020-04-14
Supplement: 2416837.f1.pdf [file 2416837.f1.pdf]

**Supplemental Table 1. Content of Resveratrol in Some Plants and Foods/Beverages**

| Plants/foods                    | Content                   |                         |             | References |
|---------------------------------|---------------------------|-------------------------|-------------|------------|
|                                 | <i>trans</i> -resveratrol | <i>cis</i> -resveratrol | Total       |            |
| <b>Grapes</b>                   |                           |                         |             |            |
| Merlot <sup>a</sup>             | 0.5 ± 0.0                 | ND                      | 0.5 ± 0.0   | 1          |
| Cabernet Sauvignon <sup>a</sup> | 0.5 ± 0.0                 | ND                      | 0.5 ± 0.0   | 1          |
| Primitivo <sup>b</sup>          | 13.9 ± 0.4                | ND                      | 13.9 ± 0.4  | 2          |
| Negroamaro <sup>b</sup>         | 3.6 ± 0.1                 | ND                      | 3.6 ± 0.1   | 2          |
| Susumaniello <sup>b</sup>       | 63.0 ± 0.9                | ND                      | 63.0 ± 0.9  | 2          |
| Uva diTroia <sup>b</sup>        | 4.6 ± 0.06                | ND                      | 4.6 ± 0.06  | 2          |
| Malvasia Nera <sup>b</sup>      | 48.5 ± 1.0                | ND                      | 48.5 ± 1.0  | 2          |
| Aglianico <sup>b</sup>          | 61.1 ± 0.8                | ND                      | 61.1 ± 0.8  | 2          |
| Cesanese <sup>b</sup>           | 8.16 ± 0.02               | ND                      | 8.16 ± 0.02 | 2          |
| Merlot Moscato <sup>b</sup>     | 9.2 ± 0.2                 | ND                      | 9.2 ± 0.2   | 2          |
| Alphonse Lavalley <sup>b</sup>  | 3.89 ± 0.01               | ND                      | 3.89 ± 0.01 | 2          |
| Rootstock <sup>a</sup> (Beta)   | 1.59                      | ND                      | 1.59        | 3          |
| Rootstock <sup>a</sup> (Shanhe) | 7.05                      | ND                      | 7.05        | 3          |

|                                                                    |             |      |             |   |
|--------------------------------------------------------------------|-------------|------|-------------|---|
| Rootstock <sup>a</sup> (Zhi)                                       | 6.21        | ND   | 6.21        | 3 |
| Rootstock <sup>a</sup> (Berlandier Resseguier 2)                   | 4.04        | ND   | 4.04        | 3 |
| Rootstock <sup>b</sup> (Dog Ridge)                                 | 3.87        | ND   | 3.87        | 4 |
| California Table Grapes <sup>a</sup> (Flame Seedless (skin))       |             |      | 1 ± 0.3     | 5 |
| California Table Grapes <sup>a</sup> (Black Corinth (skin))        |             |      | <0.1        | 5 |
| <b>Tomato Skin<sup>b</sup></b>                                     |             |      |             |   |
| MicroTom tomato                                                    | 15.3        | 2.71 | 19.4        | 6 |
| Beefsteak                                                          | ND          | ND   |             | 6 |
| Uglyripe                                                           | 0.38        | ND   | 0.38        | 6 |
| Heirloom                                                           | 1.75        | 0.11 | 1.86        | 6 |
| Plum Tom                                                           | 0.34        | ND   | 0.34        | 6 |
| <b>Juices<sup>c</sup></b>                                          |             |      |             |   |
| Red grapes juice 100%                                              | 40.0 ± 0.60 | ND   | 40.0 ± 0.60 | 2 |
| Grape juice made from concentrate 99%                              | 0.27 ± 0.01 | ND   | 0.27 ± 0.01 | 7 |
| Organic grape juice made from concentrate                          | ND          | ND   | ND          | 7 |
| Red grape Merlot juice 100%                                        | 0.16 ± 0.01 | ND   | 0.16 ± 0.01 | 7 |
| Red grape juice 65%, pomegranate juice 25%, blackcurrant juice 10% | ND          | ND   | ND          | 7 |

|                                                       |             |                |             |   |
|-------------------------------------------------------|-------------|----------------|-------------|---|
| Grape juice 50%, pomegranate juice 50%                | 0.36 ± 0.02 | ND             | 0.36 ± 0.02 | 7 |
| <b>Peanuts</b>                                        |             |                |             |   |
| Runner <sup>b</sup> (White's runner)                  |             |                | 0.07 ± 0.03 | 8 |
| Spanish <sup>b</sup> (Spanette)                       |             |                | 0.13 ± 0.11 | 8 |
| Spanish <sup>b</sup> (Pear)                           |             |                | 0.11 ± 0.09 | 8 |
| Spanish <sup>b</sup> (GA 207-3-4)                     |             |                | 0.06 ± 0.07 | 8 |
| Spanish <sup>b</sup> (PI-337396-FAV70)                |             |                | 0.02 ± 0.02 | 8 |
| Valencia <sup>b</sup> (Kalasin 1*)                    |             |                | 1.4 0.04    | 8 |
| Valencia <sup>b</sup> (Kalasin 2*)                    |             |                | 1.57 0.82   | 8 |
| Valencia <sup>b</sup> (Konkaen*)                      |             |                | 1.2 0.57    | 8 |
| Valencia <sup>b</sup> (Konkaen 4*)                    |             |                | 2.88 1.23   | 8 |
| Virginia <sup>b</sup> (NC-18016)                      |             |                | 0.31 ± 0.15 | 8 |
| Virginia <sup>b</sup> (Early Bunch)                   |             |                | 0.13 ± 0.19 | 8 |
| Virginia <sup>b</sup> (NC-17291)                      |             |                | 0.05 ± 0.07 | 8 |
| Boiled peanuts <sup>a</sup>                           | 5.1 ± 2.8   | ND             | 5.1 ± 2.8   | 1 |
| Peanut butter <sup>a</sup>                            | 0.3 ± 0.1   | ND             | 0.3 ± 0.1   | 1 |
| Whole Peanut sprout <sup>b</sup> (Germination day 0)  |             | Not Determined | 3.7 ± 0.6   | 9 |
| Whole Peanut sprout <sup>b*</sup> (Germination day 1) |             | Not Determined | 6.0 ± 0.9   | 9 |

|                                                                 |                |             |            |    |
|-----------------------------------------------------------------|----------------|-------------|------------|----|
| Whole Peanut sprout <sup>b</sup> (Germination day 2)            | Not Determined |             | 17.7 ± 3.2 | 9  |
| Whole Peanut sprout <sup>b</sup> (Germination day 3)            | Not Determined |             | 19.9 ± 2.5 | 9  |
| <b>Wines</b>                                                    |                |             |            |    |
| Pinot Noir, 1994 (California) <sup>c</sup>                      | 10.57 ± 0.6    | 7.46 ± 0.09 | 18.03      | 1  |
| Cabernet Sauvignon, 1996 (Bulgaria) <sup>c</sup>                | 6.72 ± 0.10    | 5.20 ± 0.16 | 11.92      | 1  |
| Merlot, 1994 (Chile) <sup>c</sup>                               | 0.48 ± 0.01    | 1.52 ± 0.05 | 2.0        | 1  |
| Merlot, 2000(Brazilian) <sup>c</sup>                            | 3.04           | 7.93        | 10.97      | 10 |
| Merlot, 1999(Brazilian) <sup>c</sup>                            | ND             | 12.25       | 12.25      | 10 |
| Merlot, 2002 Giacomini commercial(Brazilian) <sup>c</sup>       | 5.34           | 21.4        | 26.74      | 10 |
| Merlot, 2002 Giacomini in tank(Brazilian) <sup>c</sup>          | 4.86           | 22.99       | 27.85      | 10 |
| Merlot, 2002(Brazilian) <sup>c</sup>                            | 2              | 4.9         | 6.9        | 10 |
| Merlot 2003 microwinemaking(Brazilian) <sup>c</sup>             | 1.77           | 23.23       | 25         | 10 |
| Merlot (Italian) <sup>c</sup>                                   | 2.24           | 2.09        | 4.33       | 11 |
| Cabernet sauvignon 2003 microwinemaking(Brazilian) <sup>c</sup> | ND             | 4.16        | 4.16       | 10 |
| Cabernet sauvignon 2002 Giacomini(Brazilian) <sup>c</sup>       | 2.41           | 1.70        | 4.11       | 10 |
| Cabernet sauvignon 2000(Brazilian) <sup>c</sup>                 | ND             | 3.04        | 3.04       | 10 |
| Cabernet-sauvignon 2001 (Brazilian) <sup>c</sup>                | 2.06           | 7.02        | 9.08       | 10 |
| Cabernet Sauvignon, 1995 (California) <sup>c</sup>              | 0.53 ± 0.01    | 0.45 ± 0.01 | 0.98       | 1  |

|                                                               |                           |      |              |    |
|---------------------------------------------------------------|---------------------------|------|--------------|----|
| Cabernet franc 2001(Brazilian) <sup>c</sup>                   | 2.27                      | 8.43 | 10.70        | 10 |
| Tannat 2000(Brazilian) <sup>c</sup>                           | ND                        | 1.91 | 1.91         | 10 |
| Monovarietal white wines (Portugal) <sup>c</sup>              | 0.6                       | 0.4  | 1.0          | 12 |
| Fortified wines (Portugal) <sup>c</sup>                       | 0.8                       | 0.1  | 0.9          | 12 |
| Monovarietal red wines (Portugal) <sup>c</sup>                | 1.0                       | 2.6  | 3.6          | 12 |
| Blended red wines (Portugal) <sup>c</sup>                     | 1.5                       | 2.1  | 3.6          | 12 |
| Blended white wines (Portugal) <sup>c</sup>                   | 0.5                       | 0.2  | 0.7          | 12 |
| Red wines (France) <sup>c</sup>                               | 3.0                       | 2.6  | 5.6          | 12 |
| Vintage 1990 <sup>c</sup>                                     | 1                         |      | 1            | 13 |
| Vintage 1995                                                  | 15 ± 3 <sup>d</sup>       |      | 15 ± 3       | 13 |
| Vintage 1997                                                  | 48 ± 5 <sup>d</sup>       |      | 48 ± 5       | 13 |
| <b>Itadori Root</b>                                           |                           |      |              |    |
| Commercial root <sup>a</sup>                                  | 523 ± 1                   | ND   | 523 ± 1      | 1  |
| Itadori tea <sup>c</sup>                                      | 0.68 ± 0.01               | ND   | 0.68 ± 0.01  | 1  |
| Hairy root cultures of <i>Ligularia fischeri</i> <sup>b</sup> |                           |      |              | 14 |
| <b>Berries</b>                                                |                           |      |              |    |
| Raw highbush Michigan blueberry                               | 140.0 ± 29.9 <sup>e</sup> |      | 140.0 ± 29.9 | 15 |
| Raw highbush British Columbia blueberry                       | ND                        |      | ND           | 15 |

|                                          |                          |             |    |
|------------------------------------------|--------------------------|-------------|----|
| Raw rabbiteye Mississippi blueberry      | ND                       | ND          | 15 |
| Raw lowbush “wild” Nova Scotia blueberry | 56.2 ± 15.7 <sup>c</sup> | 56.2 ± 15.7 | 15 |
| Raw Polish bilberry                      | 71.0 ± 15.0 <sup>c</sup> | 71.0 ± 15.0 | 15 |

---

<sup>a</sup>Data expressed  $\mu\text{g/g}$  fresh weight, mean  $\pm$  SE; <sup>b</sup>Data expressed  $\mu\text{g/g}$  dry weight, mean  $\pm$  SD; <sup>c</sup>Data expressed as mg/litter, mean  $\pm$  SE; <sup>d</sup>Data expressed as mg/litter, mean  $\pm$  SD; <sup>e</sup> $\mu\text{mol/g}$ , mean  $\pm$  SD; \*1-day germination; ND: not detected.
